# Supplementary material
Source: PubMed Central journal article supplement (PMC3946671)
Supplement: NIHMS550355-supplement-03.pdf [file NIHMS550355-supplement-03.pdf]

**Table S1. Summary of conditions used to scale expression of *reaper* and the resulting effect on survival of wL3 animals.**

| delivery of <i>reaper</i> |           |                 |                       |                     | Effect of <i>reaper</i> |                     |
|---------------------------|-----------|-----------------|-----------------------|---------------------|-------------------------|---------------------|
| T (°C)                    | h.s. time | # <i>hs-rpr</i> | dose of <i>reaper</i> | $t_{1/2}$ lethality | survival @ 12hrs (%)    | eclosing adults (%) |
| 30                        | 30'       | 1               | 0.93                  | -                   | 97.7                    | 96.6                |
| 34                        | 30'       | 1               | 11.5                  | ~7.3 hrs            | 10.7                    | 9.3                 |
| 35                        | 30'       | 1               | 17                    | ~3.6 hrs            | 0                       | 0                   |
| 37                        | 30'       | 1               | 121.9                 | ~2.1 hrs            | 0                       | 0                   |
| 38                        | 30'       | 1               | 194.7                 | ~1.5 hrs            | 0                       | 0                   |
| 37                        | 30'       | 2               | 354.1                 | ~ 0.5hrs            | 0                       | 0                   |
| 39                        | 60'       | 2               | 442.9                 | ~ 0.25 hrs          | 0                       | 0                   |

The dose of *reaper* after each treatment also represented in graphical form in Figure 1B. Death curves similar to that shown in Figure S1A were performed for each condition in order to calculate the survival (12-hour and eclosion) and rate of lethality ( $t_{1/2}$  lethality). h.s.=heat shock.

**Table S2. qPCR primer sequences used in this study.**

| Gene           | Primer sequence         | Source      |
|----------------|-------------------------|-------------|
| <i>rp49</i> F  | CCAGTCGGATCGATATGCTAA   | (a)         |
| <i>rp49</i> R  | ACGTTGTGCACCAGGAACTT    |             |
| <i>rpr</i> F   | ATCCGAAGACCGGAAGAAAG    | (b)         |
| <i>rpr</i> R   | GTGGCTCTGTGTCCTTGACTG   |             |
| <i>Ark</i> F   | TGCACTTCATCGGAGTATCG    | (a)         |
| <i>Ark</i> R   | AGATCGATCCACTGGCATTTC   |             |
| <i>Nc</i> F    | CTCGCTAAACGAACGGAGAAC   | (b)         |
| <i>Nc</i> R    | CAACGACACCCACATAAGGG    |             |
| <i>drice</i> F | CAGGGCGACAGATTGGATGG    | this report |
| <i>drice</i> R | GCCGCGGGTGGTGTTC        |             |
| <i>dcp-1</i> F | CTGGAGAAGGGCGTTACCGAGAC | this report |
| <i>dcp-1</i> R | ATTGTTGATGTTGCGCCAGGAGA |             |
| <i>dredd</i> F | ATACAAGCCTGCCAGGAGAA    | (a)         |
| <i>dredd</i> R | AGGATATCGGCGATGTGTTC    |             |
| <i>diap1</i> F | CACACAGGCTTCAGAGGAAGAG  | this report |
| <i>diap1</i> R | CTGCTGTTTGTTCGAGGGAGTAG |             |
| <i>hid</i> F   | ATCCAGTCTGCCATACCGATAG  | (b)         |
| <i>hid</i> R   | AACAGTTGGCCAAGTGAAGCTC  |             |

Source references: (a) (Denton *et al.* 2009, *Curr Bio* 19:1741-1746), (b) (Ihry *et al.* 2012, *PLoS Genet* 8(11):e1003085).
